# Supplementary material
Source: MDPI journal article supplement (https://www.mdpi.com/2073-445X/11/3/371)
Supplement: s1 [file s1 › land-1609341-supplementary.pdf]

## Supplementary Information

### Conservation Prioritization in a Tiger Landscape: Is Umbrella Species Enough?

Vaishali Vasudeva<sup>1,2</sup>, Sujata Upgupta<sup>1</sup>, Ajay Singh<sup>1</sup>, Nazrukh Sherwani<sup>1</sup>, Supratim Dutta<sup>1</sup>, Rajasekar Rajaraman<sup>1</sup>, Sankarshan Chaudhuri<sup>1</sup>, Satyam Verma<sup>1,3</sup>, Jeyaraj Antony Johnson<sup>1</sup>, and Ramesh Krishnamurthy<sup>1,2\*</sup>

<sup>1</sup>Wildlife Institute of India, Chandrabani, Dehradun, Uttarakhand-248001, India

<sup>2</sup>Faculty of Forestry, University of British Columbia, 2424 Main Mall, Vancouver V6T 1Z4, Canada

<sup>3</sup>School of Environmental and Forest Sciences, University of Washington, Seattle, WA, 98195, USA

\*Corresponding author: [ramesh@wii.gov.in](mailto:ramesh@wii.gov.in) (RK)

**Table S1.** Description of terms used in this study.

| Term                           | Description                                                                                                                                                                                                                                                                              |
|--------------------------------|------------------------------------------------------------------------------------------------------------------------------------------------------------------------------------------------------------------------------------------------------------------------------------------|
| Planning area                  | Planning area is the spatial extent over which the planning process occurs.                                                                                                                                                                                                              |
| Planning units                 | Planning area is usually subdivided into smaller “planning units” for management or conservation actions.                                                                                                                                                                                |
| Conserved                      | Conserved units refer to the area which already has sufficient protection, i.e., protected areas in this case.                                                                                                                                                                           |
| Excluded                       | Excluded areas refer to the areas which cannot be included in the planned reserve, e.g., areas with high pollution, areas heavily infested with invasive species, etc.                                                                                                                   |
| Available                      | Available units refer to the planning units that can be considered by the algorithm to be included in the reserve design.                                                                                                                                                                |
| Cost                           | Conservation cost is the cost of including a planning unit in the reserve design. It can be defined simply as the planning unit area, as the actual fiscal cost required to purchase the land, or as the opportunity cost of displaced incompatible ecosystem uses (Daigle et al. 2020). |
| Conservation features          | Conservation features are features for which a target is set, e.g., habitats, species, or processes.                                                                                                                                                                                     |
| Target                         | Target or conservation target is the minimum quantity or proportion of the conservation feature in the study area to be included in solutions.                                                                                                                                           |
| Boundary length modifier (BLM) | Boundary length modifier controls the reserve boundary length in relation to reserve system cost. Assigning higher BLM values leads to compact reserve designs.                                                                                                                          |
| Species penalty factor (SPF)   | Species penalty factor is a user-defined value for the penalty applied to the objective function when a conservation feature target is not met for a given reserve design scenario.                                                                                                      |
| Best solution                  | This is one of the Marxan outputs. It is an arrangement of selected planning units that has the lowest objective function value (i.e., the most efficient solution).                                                                                                                     |

|                     |                                                                                                                                                                                                                                               |
|---------------------|-----------------------------------------------------------------------------------------------------------------------------------------------------------------------------------------------------------------------------------------------|
| Selection frequency | This is another Marxan output and is interpreted as the frequency with which a given planning unit is selected in the final reserve system across a series of Marxan solutions (or runs). This should not be interpreted as irreplaceability. |
|---------------------|-----------------------------------------------------------------------------------------------------------------------------------------------------------------------------------------------------------------------------------------------|

**Table S2.** Resistance matrix used for calculation of connectivity with the least-cost path method.

|            | Water | Non Forest | Scrub | Forest |
|------------|-------|------------|-------|--------|
| Water      | 5     | 100        | 25    | 5      |
| Non Forest | 50    | 5          | 25    | 5      |
| Scrub      | 25    | 100        | 5     | 5      |
| Forest     | 50    | 100        | 25    | 5      |

**Table S3.** Coefficients, standard error, and p values for logistic regression and z-test.

| Biodiversity Potential Class | Intercept | Tree Richness | Shrub Richness | Herb Richness | Carnivore Richness | Herbivore Richness | Primate Richness | Rodent Richness | Mammal Richness | Vegetation Richness | Total Richness |
|------------------------------|-----------|---------------|----------------|---------------|--------------------|--------------------|------------------|-----------------|-----------------|---------------------|----------------|
| <b>Coefficients</b>          |           |               |                |               |                    |                    |                  |                 |                 |                     |                |
| Moderate                     | 3.971     | -0.308        | 0.442          | -0.285        | -0.706             | -0.424             | 1.803            | -0.294          | 0.380           | -0.152              | 0.227          |
| High                         | 4.938     | -0.518        | 0.249          | -0.722        | -3.403             | -3.534             | 12.473           | -3.233          | 2.303           | -0.991              | 1.312          |
| <b>Standard Error</b>        |           |               |                |               |                    |                    |                  |                 |                 |                     |                |
| Moderate                     | 0.652     | 0.0641        | 0.100          | 0.053         | 0.148              | 0.143              | 0.000            | 0.293           | 0.069           | 0.038               | 0.039          |
| High                         | 0.665     | 0.0652        | 0.102          | 0.056         | 0.150              | 0.145              | 0.000            | 0.294           | 0.069           | 0.039               | 0.039          |
| <b>p-values</b>              |           |               |                |               |                    |                    |                  |                 |                 |                     |                |
| Moderate                     | 1.12e-09  | 1.45e-06      | 9.97e-06       | 9.80e-08      | 1.97e-06           | 0.003              | 0.00             | 0.003           | 3.5e-08         | 6.73e-05            | 3.92e-09       |
| High                         | 1.10e-13  | 1.99e-15      | 1.47e-02       | 0.00          | 0.00               | 0.00               | 0.00             | 0.00            | 0.00            | 0.00                | 0.00           |

**Table S4.** Confusion matrix for multinomial logistic regression model.

|                  |          | Biodiversity Potential |          |      |
|------------------|----------|------------------------|----------|------|
|                  |          | Low                    | Moderate | High |
| Model prediction | Low      | 7                      | 7        | 3    |
|                  | Moderate | 36                     | 194      | 114  |
|                  | High     | 9                      | 121      | 339  |

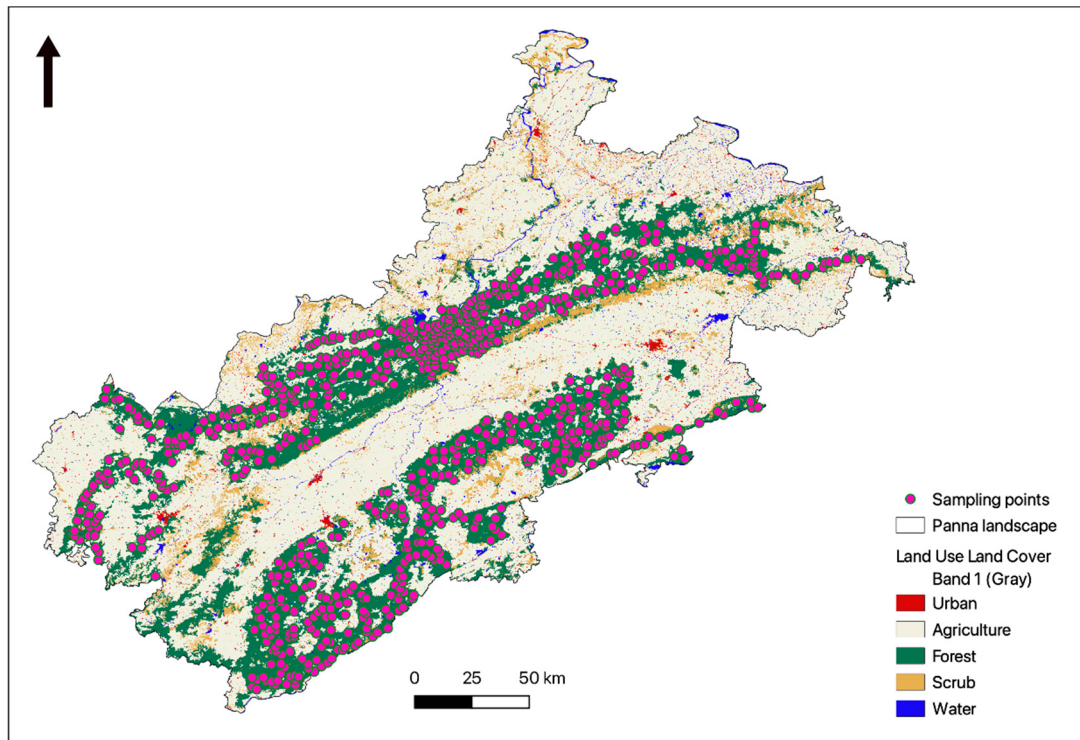

**Figure S1.** Distribution of field sampling points in the landscape.
